# Supplementary material for: Carotenoid Cleavage Dioxygenase Genes of <em>Chimonanthus praecox</em>, <em>CpCCD7</em> and <em>CpCCD8</em>, Regulate Shoot Branching in <em>Arabidopsis</em>
Source: Preprints.org preprint supplement (doi:10.20944/preprints202108.0308.v1), 2021-08-14
Supplement: Supplementary file 1 [file Supplementary files.docx]

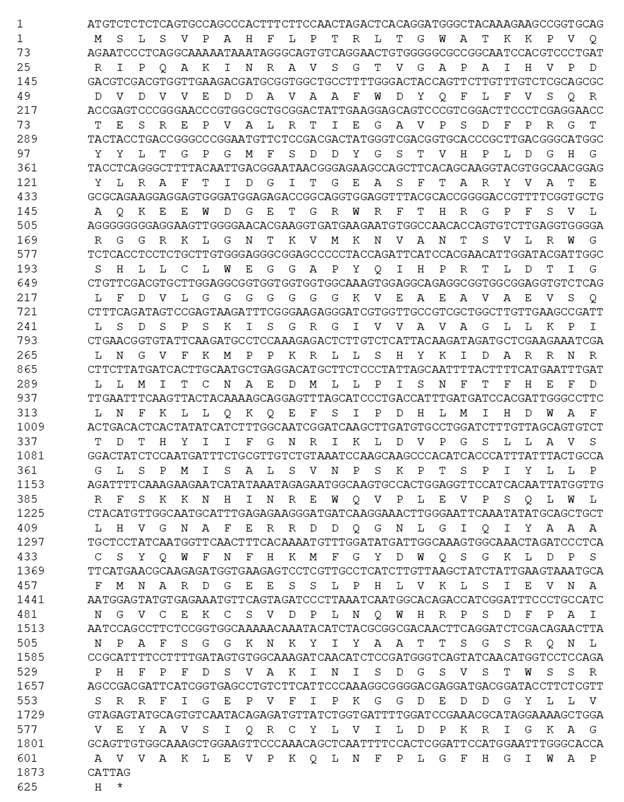


Figure S1. Nucleotide and amino acid sequence of *CpCCD7*


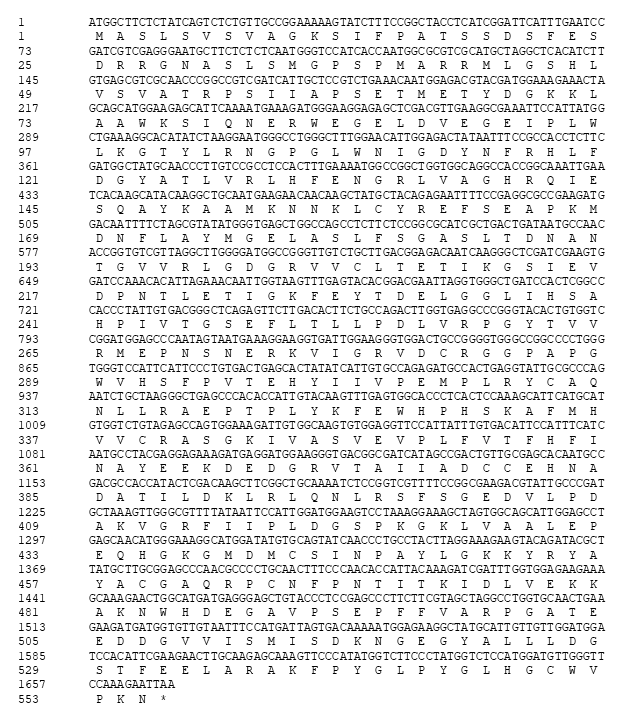


Figure S2. Nucleotide and amino acid sequence of *CpCCD8*

Table S1. Primers used for *CpCCD7* and *CpCCD8* PCR and quantitative real-time PCR (qRT-PCR)

| Primer sequences (5’-3’) | Primer sequence (5’-3’) | Purpose of  primers | Annealing  temperatures℃ |
| --- | --- | --- | --- |
| CpCCD7-F | GATCTCTCGATATTATATCGTGAGTT | Full-length amplification | 56 |
| CpCCD7-R | TACAAGTGATTATGATTTCCATTATC |
| CpCCD8-F | CATTCTGGCCATGGCTTCTCTATC | 56 |
| CpCCD8-R | CATCCATGCTCATCATCATTGTCG |
| qRT-CpCCD7-F | GGAATGTTCTCCGACGACTATGG | Real-time quantification | 58 |
| qRT-CpCCD7-R | CATCACCTTCGTGTTCCCCAAC |
| qRT-CpCCD8-F | CGTATTGCCCGATGCTAAAGTTG | 58 |
| qRT-CpCCD8-R | TCCGCAAGCATAAGCGTATCTGT |
| CpActin-F | AGGCTAAGATTCAAGACAAGG | 58 |
| CpActin-R | TTGGTCGCAGCTGATTGCTGTG |
| CpTublin-F | GTGCATCTCTATCCACATCG | 58 |
| CpTublin-R | CAAGCTTCCTTATGCGATCC |
| qRT-AtBRC1-F | TTCCCAGTGATTAACCACCAT |  | 56 |
| qRT-AtBRC1-R | TCCGTAAACTGATGCTGCTC |  |
| AtActin-F | GACTCAGATCATGTTTGAGACCTTT |  | 59 |
| AtActin-R | CCAGAGTCCAACACAATACCG |  |

Table S2. Primers used for plasmid construction

| Primer  name | Primer sequences (5’-3’) | Purpose of  primers | Annealing  temperatures℃ |
| --- | --- | --- | --- |
| CpCCD7-F | GGGGACAAGTTTGTACAAAAAAGCAGGCT  *att*B1  TATCAGATGTCTCTCTCAGTGCCAGC | PGWB551 | 66 |
| CpCCD7-R | GGGGACCACTTTGTACAAGAAAGCTGGGT  *att*B2  TACAAGTGATTATGATTTCCATTATC |
| CpCCD8-F | GGGGACAAGTTTGTACAAAAAAGCAGGCT  *att*B1  ATGGCTTCTCTATCAGTCTCTGTTG | 65 |
| CpCCD8-R | GGGGACCACTTTGTACAAGAAAGCTGGGT *att*B2  ATTCTTTGGAACCCAACATCCATGG |
| CpCCD7-F | GGGGTACC TATCAGATGTCTCTCTCAGTGCCAG | pCAMBIA  1300 | 63.5 |
| CpCCD7-R | GCTCTAGA ATGTGGTGCCCAAATTCCATGGAAT |
| CpCCD8-F | GGGGTACC CATTCTGGCCATGGCTTCTCTATC | 63.5 |
| CpCCD8-R | GCTCTAGA ATTCTTTGGAACCCAACATCCATG |
